# Supplementary material for: A Co(ii) complex of a vitamer of vitamin B6acts as a sensor for Hg2+and pH in aqueous media
Source: Royal Society of Chemistry journal article supplement (doi:10.1039/c6nj00410e), 2016-01-01
Supplement: c6nj00410e1.pdf [file c6nj00410e1.pdf]

**Electronic Supplementary Information (ESI) for the Manuscript ID [NJ-ART-02-2016-000410.R1](#)**

**A Co(II) complex of a vitamer of vitamin B<sub>6</sub> acts as sensor of Hg<sup>2+</sup> and pH in aqueous media**

Nilam Sing<sup>a</sup>, Sanjay Roy<sup>b</sup>, Partha Sarathi Guin<sup>b</sup>, Kalachand Mahali<sup>\*c</sup>, Prakash Majee<sup>d</sup>, Sudip Kumar Mondal<sup>\*d</sup>, Partha Mahata<sup>e</sup>, Partha Sarathi Sengupta<sup>a</sup>, Palash Mondal<sup>\*a</sup>

<sup>a</sup>Department of Chemistry(UG & PG), Vivekananda Mahavidyalaya, Burdwan-713103, India

<sup>b</sup>Department of Chemistry , Shibpur Dinobundhoo Institution (College), 412/1 G. T. Road (South), Howrah-711102, India

<sup>c</sup>Department of Chemistry , University of Kalyani, Kalyani-741235, India

<sup>d</sup>Department of Chemistry, Visva-Bharati, Santiniketan-731235, India

<sup>d</sup>Department of Chemistry, Suri Vidyasagar College, Suri -731101, India

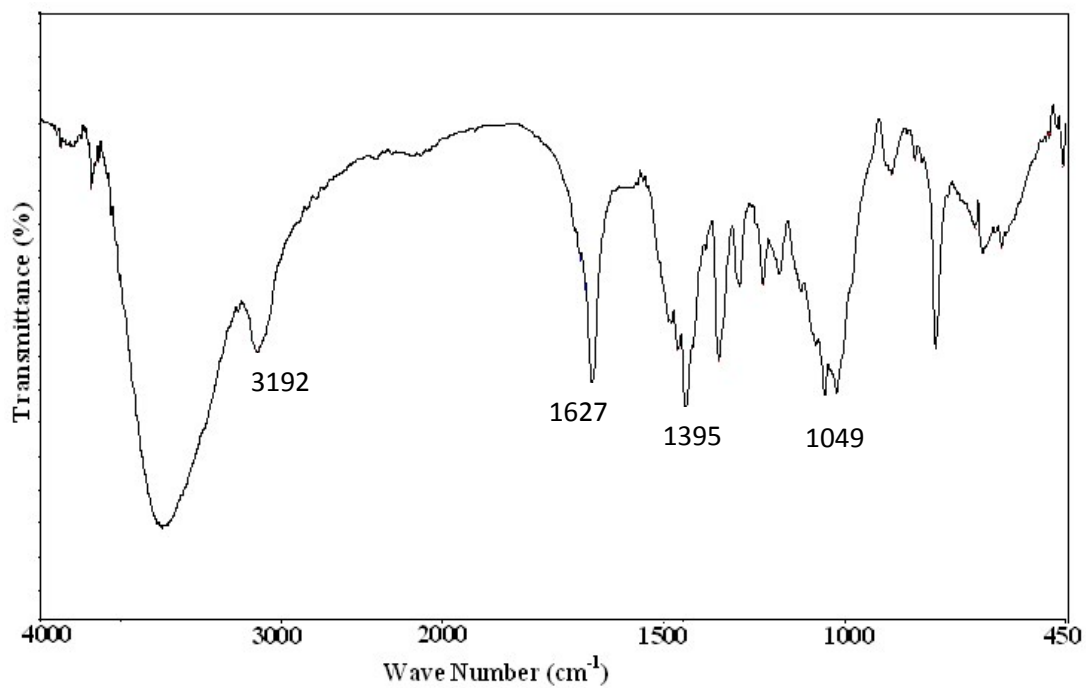

**Figure S1:** FTIR Spectra of complex 1

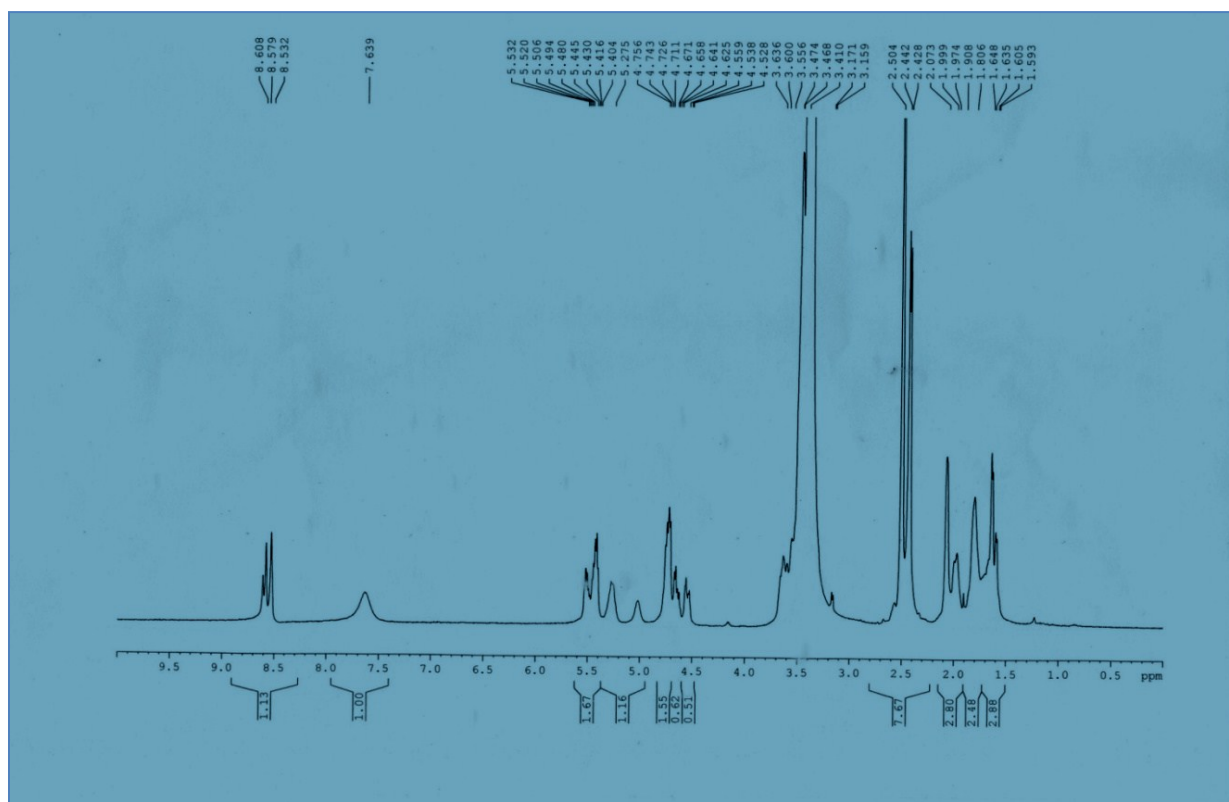

**Figure S2:** <sup>1</sup>H NMR of complex 1

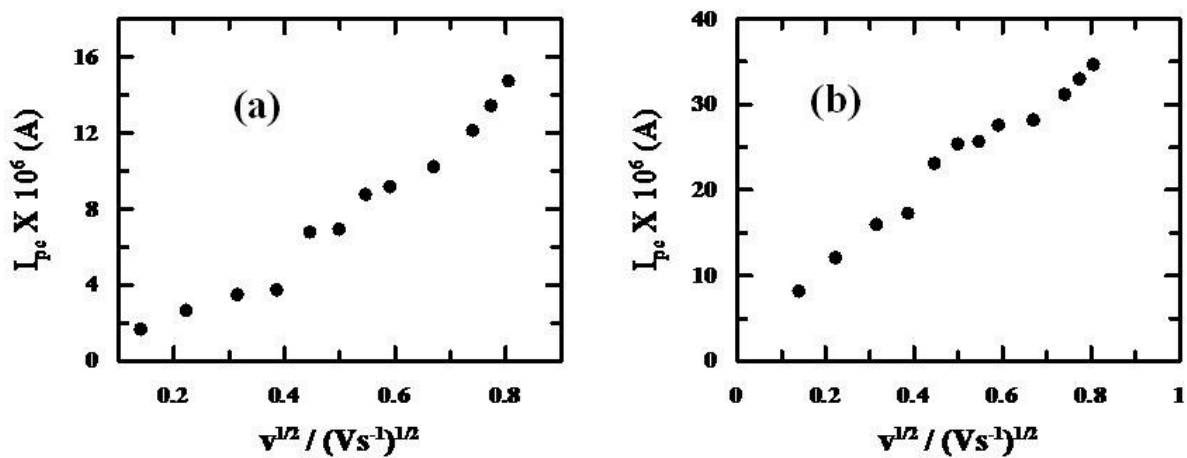

**Figure S3:** Plot of Cathodic peak currents [ $I_{p1}$  (a) and  $I_{p2}$  (b)] for the first and second reduction of complex 1 in dimethyl sulphoxide media.

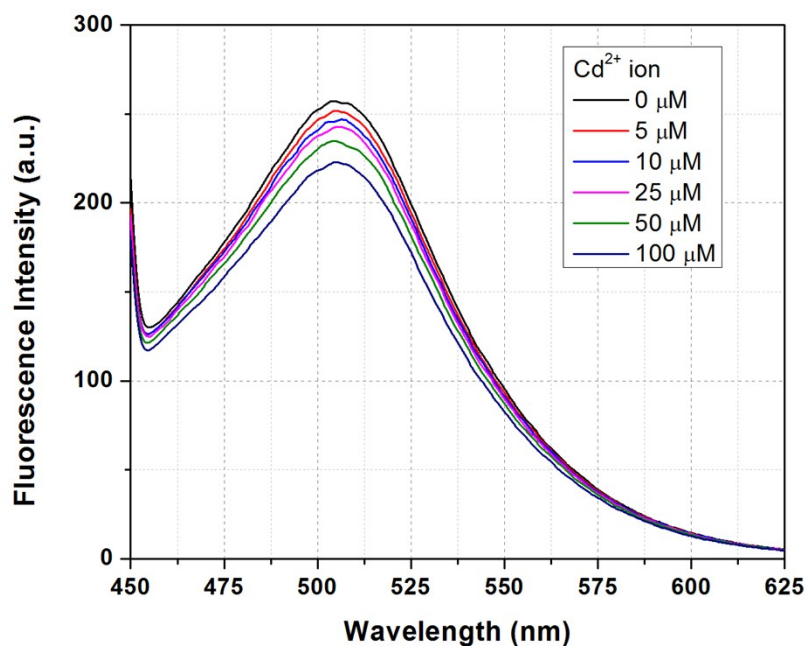

**Figure S4:** Emission spectra of complex 1 in aqueous solution upon addition of increasing amount of  $Cd^{2+}$  ( $\lambda_{ex} = 425$  nm). Concentration of  $Cd^{2+}$  in the medium is indicated in the legend.

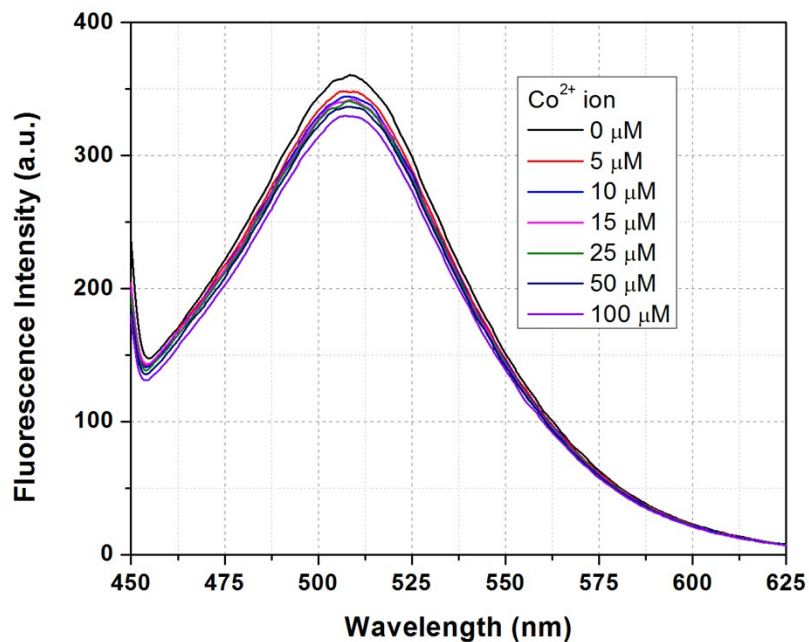

**Figure S5:** Emission spectra of complex 1 in aqueous solution upon addition of increasing amount of  $\text{Co}^{2+}$  ( $\lambda_{\text{ex}} = 425 \text{ nm}$ ). Concentration of  $\text{Co}^{2+}$  in the medium is indicated in the legend.

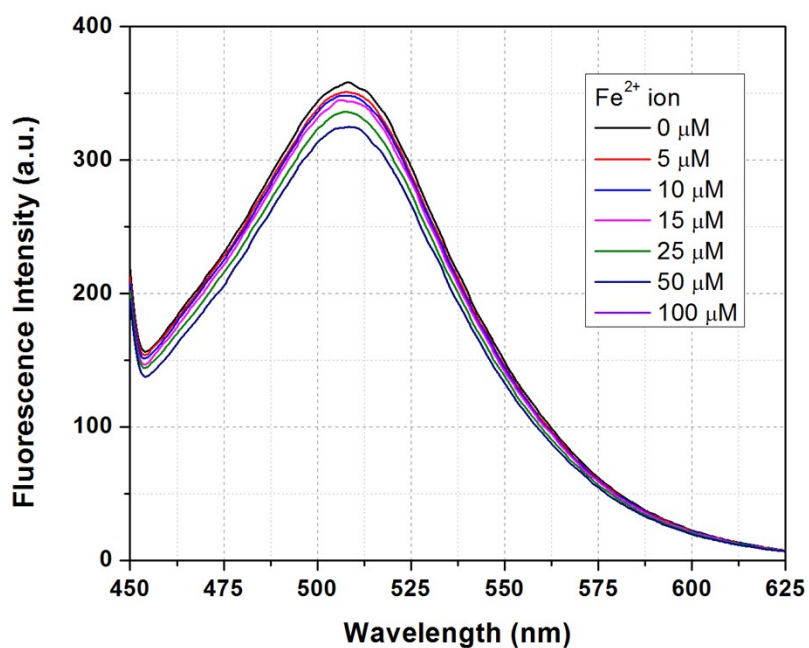

**Figure S6:** Emission spectra of complex 1 in aqueous solution upon addition of increasing amount of  $\text{Fe}^{2+}$  ( $\lambda_{\text{ex}} = 425 \text{ nm}$ ). Concentration of  $\text{Fe}^{2+}$  in the medium is indicated in the legend.

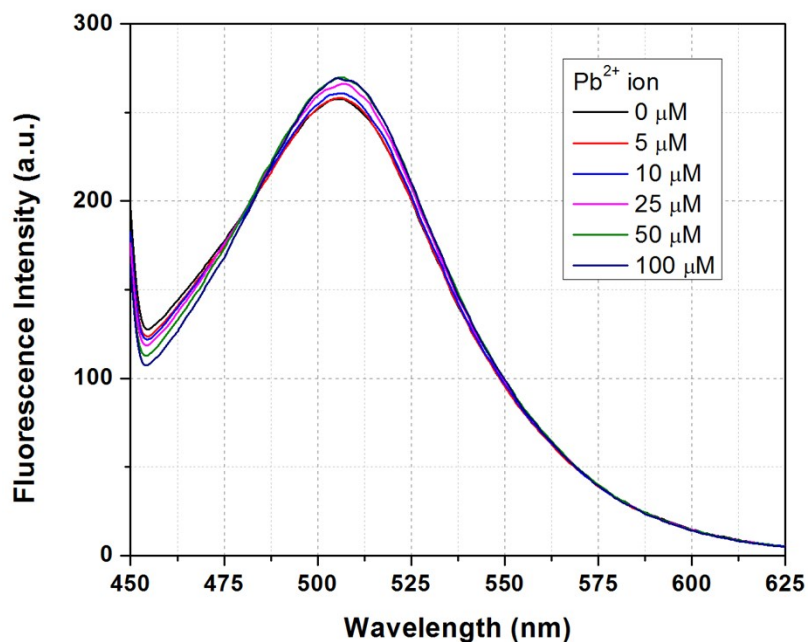

**Figure S7:** Emission spectra of complex 1 in aqueous solution upon addition of increasing amount of  $\text{Pb}^{2+}$  ( $\lambda_{\text{ex}} = 425 \text{ nm}$ ). Concentration of  $\text{Pb}^{2+}$  in the medium is indicated in the legend.

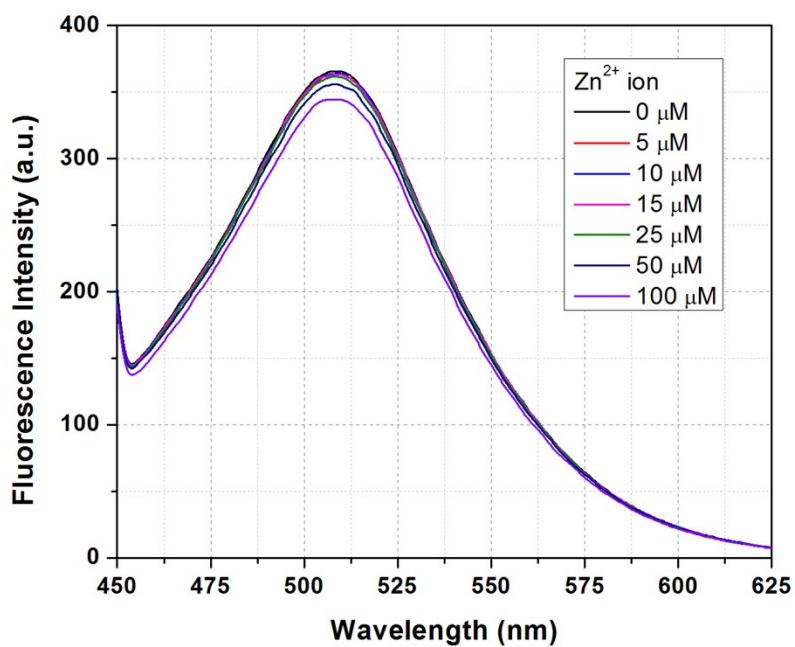

**Figure S8:** Emission spectra of complex 1 in aqueous solution upon addition of increasing amount of  $\text{Zn}^{2+}$  ( $\lambda_{\text{ex}} = 425 \text{ nm}$ ). Concentration of  $\text{Zn}^{2+}$  in the medium is indicated in the legend.

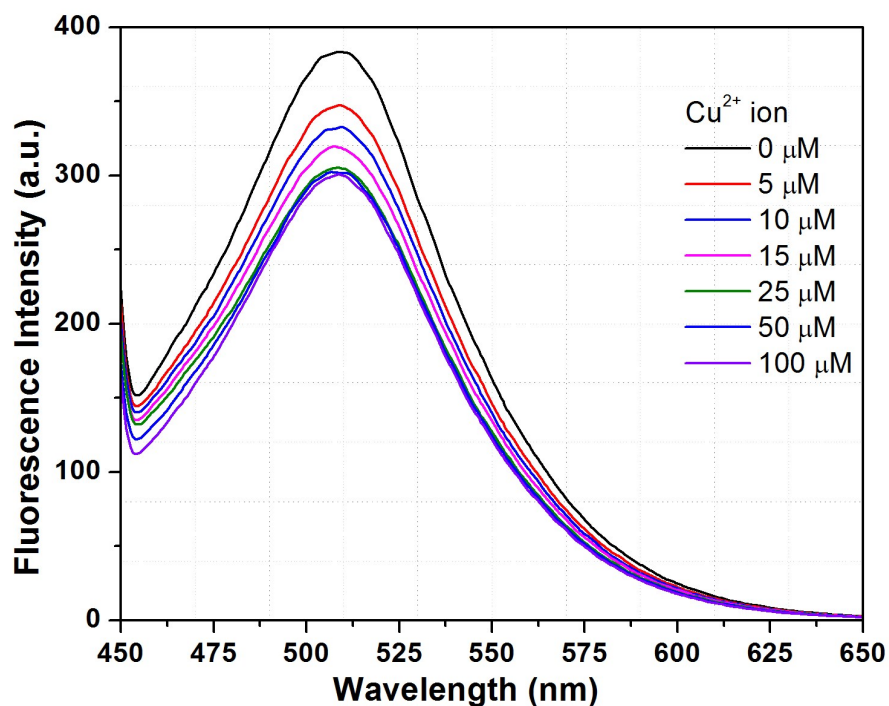

**Figure S9:** Emission spectra of complex 1 in aqueous solution upon incremental addition of  $\text{Zn}^{2+}$  ions ( $\lambda_{\text{ex}}=425$  nm). Concentration of  $\text{Cu}^{2+}$  ions in the medium is indicated in the legend.

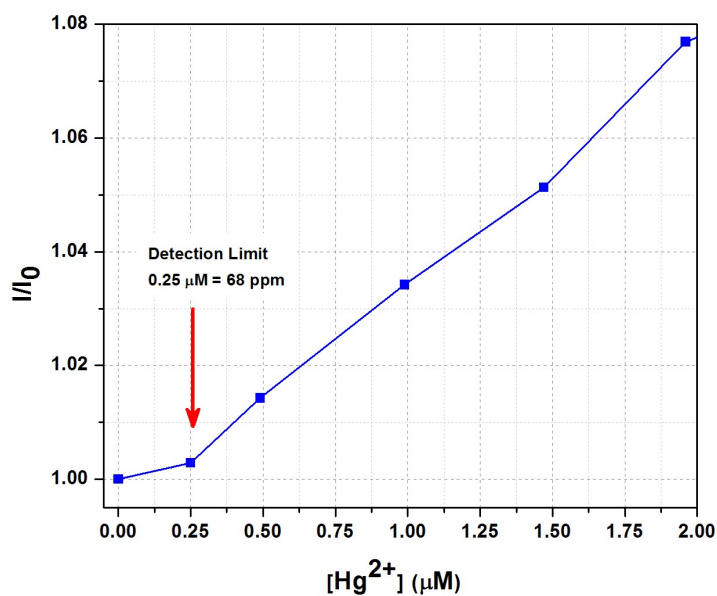

**Figure S10:** Fluorescence enhancement (at  $\lambda_{\text{em}}=506$  nm) versus concentration of  $\text{Hg}^{2+}$  ions indicating the detection limit.  $I_0$  and  $I$  are the fluorescence intensity of complex 1 in absence and presence of  $\text{Hg}^{2+}$  ions, respectively.

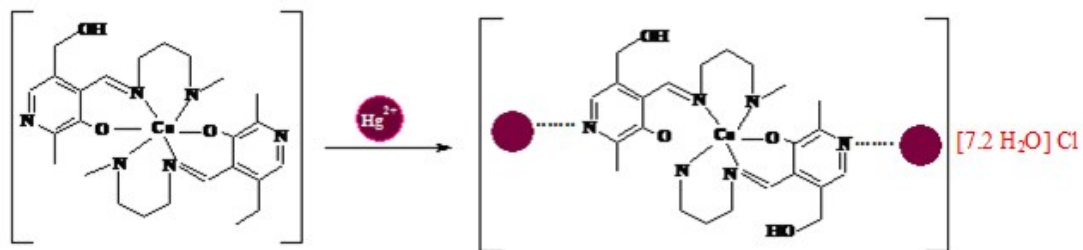

**Scheme S1:** Probable non covalent type interaction between complex 1 and  $\text{Hg}^{2+}$  ions.

| Scan Rate ( $\text{mV s}^{-1}$ ) | $E_{p1}$ (mV) | $E_{p2}$ (mV) |
|----------------------------------|---------------|---------------|
| 20                               | -590          | -1540         |
| 100                              | -635          | -1560         |
| 150                              | -685          | -1570         |
| 250                              | -700          | -1580         |
| 350                              | -705          | -1610         |
| 450                              | -720          | -1615         |
| 650                              | -730          | -1625         |

**Table S1:** Variation of reduction potentials with scan rate for the reduction of the complex 1 in dimethyl sulphoxide media.
